# Supplementary material for: Trade-offs between fighting and breeding: a social network analysis of bison male interactions
Source: Oxford University Press journal article supplement (doi:10.1093/jmammal/gyaa172), 2020-12-10

**Supplementary Data SD1:** Data Supporting Factor Test Results and Comparisons Between Network and Dominance MeasuresTables of Regression and Correlation Results for All Network and Dominance Measures

**Table SD1-1.** Degrees of freedom (DF), correlation coefficient ( $r$ ), 95% confidence intervals,  $P$ -value after randomization, adjusted  $P$ -value from the 4-way Benjamini and Hochberg (B-H) false discovery rate method (using the four network centrality measures), and adjusted  $P$ -value from the 6-way B-H false discovery rate method (using the four network centrality measures and two traditional dominance measures) for **age, mass, number of matings, and offspring sired** by bison males in 2004.

| Factor of Interest | Measure       | DF  | Correlation Coefficient ( $r$ ) | 95% Confidence Interval | $P$ -value | 4-way B-H Adjusted $P$ -value | 6-way B-H Adjusted $P$ -value |
|--------------------|---------------|-----|---------------------------------|-------------------------|------------|-------------------------------|-------------------------------|
| <b>Age</b>         |               |     |                                 |                         |            |                               |                               |
|                    | Out-degree    | 109 | 0.475                           | 0.409 - 0.558           | 0.0001     | 0.0001                        | 0.0002                        |
|                    | Strength      | 109 | 0.455                           | 0.353 - 0.564           | 0.0001     | 0.0001                        | 0.0001                        |
|                    | Closeness     | 109 | 0.498                           | 0.345 - 0.649           | 0.0001     | 0.0002                        | 0.0003                        |
|                    | Betweenness   | 109 | 0.364                           | 0.280 - 0.478           | 0.0020     | 0.0020                        | 0.0024                        |
|                    | David's score | 109 | 0.308                           | 0.228 - 0.403           | 0.0043     |                               | 0.0043                        |
|                    | Elo-rating    | 109 | 0.416                           | 0.332 - 0.510           | 0.0001     |                               | 0.0001                        |
| <b>Mass</b>        |               |     |                                 |                         |            |                               |                               |
|                    | Out-degree    | 38  | 0.464                           | 0.354 - 0.589           | 0.0053     | 0.0071                        | 0.0106                        |
|                    | Strength      | 38  | 0.458                           | 0.251 - 0.608           | 0.0021     | 0.0042                        | 0.0063                        |
|                    | Closeness     | 38  | 0.590                           | 0.286 - 0.765           | 0.0001     | 0.0004                        | 0.0006                        |
|                    | Betweenness   | 38  | 0.403                           | 0.257 - 0.553           | 0.0131     | 0.0131                        | 0.0186                        |
|                    | David's score | 38  | 0.313                           | 0.146 - 0.533           | 0.0496     |                               | 0.0496                        |
|                    | Elo-rating    | 38  | 0.378                           | 0.216 - 0.588           | 0.0155     |                               | 0.0186                        |
| <b>Matings</b>     |               |     |                                 |                         |            |                               |                               |
|                    | Out-degree    | 30  | 0.572                           | 0.286 - 0.777           | 0.0014     | 0.0028                        | 0.0028                        |
|                    | Strength      | 30  | 0.432                           | 0.091 - 0.674           | 0.0130     | 0.0130                        | 0.0130                        |
|                    | Closeness     | 30  | 0.496                           | 0.205 - 0.669           | 0.0042     | 0.0056                        | 0.0063                        |
|                    | Betweenness   | 30  | 0.591                           | -0.005 - 0.83           | 0.0012     | 0.0028                        | 0.0028                        |
|                    | David's score | 30  | 0.571                           | 0.337 - 0.770           | 0.0009     |                               | 0.0036                        |
|                    | Elo-rating    | 30  | 0.445                           | 0.228 - 0.729           | 0.0101     |                               | 0.0121                        |
| <b>Offspring</b>   |               |     |                                 |                         |            |                               |                               |
|                    | Out-degree    | 40  | 0.443                           | 0.202 - 0.687           | 0.0050     | 0.0100                        | 0.0100                        |
|                    | Strength      | 40  | 0.316                           | 0.053 - 0.569           | 0.0414     | 0.0414                        | 0.0414                        |
|                    | Closeness     | 40  | 0.377                           | 0.130 - 0.592           | 0.0150     | 0.0190                        | 0.0190                        |
|                    | Betweenness   | 40  | 0.496                           | 0.130 - 0.782           | 0.0009     | 0.0036                        | 0.0054                        |
|                    | David's score | 40  | 0.450                           | 0.229 - 0.666           | 0.0041     |                               | 0.0100                        |
|                    | Elo-rating    | 40  | 0.367                           | 0.160 - 0.593           | 0.0158     |                               | 0.0190                        |

**Table SD1-2.** Degrees of freedom (DF), correlation coefficient ( $r$ ), 95% confidence intervals,  $P$ -value after randomization, adjusted  $P$ -value from the 4-way Benjamini and Hochberg (B-H) false discovery rate method (using the four network centrality measures), and adjusted  $P$ -value from the 6-way B-H false discovery rate method (using the four network centrality measures and two traditional dominance measures) for measures of **breeding tactic and tending effort** by bison males during 2004.

| Factor of Interest                                    | Measure       | DF  | Correlation Coefficient ( $r$ ) | 95% Confidence Interval | $P$ -value | 4-way B-H Adjusted $P$ -value | 6-way B-H Adjusted $P$ -value |
|-------------------------------------------------------|---------------|-----|---------------------------------|-------------------------|------------|-------------------------------|-------------------------------|
| <b>Number of Females Tended</b>                       |               |     |                                 |                         |            |                               |                               |
|                                                       | Out-degree    | 108 | 0.548                           | 0.459 - 0.650           | 0.0001     | 0.0001                        | 0.0002                        |
|                                                       | Strength      | 108 | 0.538                           | 0.418 - 0.646           | 0.0001     | 0.0001                        | 0.0001                        |
|                                                       | Closeness     | 108 | 0.564                           | 0.431 - 0.676           | 0.0001     | 0.0002                        | 0.0003                        |
|                                                       | Betweenness   | 108 | 0.455                           | 0.280 - 0.595           | 0.0001     | 0.0001                        | 0.0001                        |
|                                                       | David's score | 108 | 0.329                           | 0.196 - 0.452           | 0.0005     |                               | 0.0005                        |
|                                                       | Elo-rating    | 108 | 0.461                           | 0.341 - 0.575           | 0.0001     |                               | 0.0001                        |
| <b>Number of Satellite Males Attending</b>            |               |     |                                 |                         |            |                               |                               |
|                                                       | Out-degree    | 53  | 0.932                           | 0.867 - 0.967           | 0.0001     | 0.0002                        | 0.0003                        |
|                                                       | Strength      | 53  | 0.819                           | 0.684 - 0.901           | 0.0001     | 0.0001                        | 0.0002                        |
|                                                       | Closeness     | 53  | 0.598                           | 0.479 - 0.710           | 0.0001     | 0.0001                        | 0.0001                        |
|                                                       | Betweenness   | 53  | 0.278                           | 0.080 - 0.566           | 0.0448     | 0.0448                        | 0.0448                        |
|                                                       | David's score | 53  | 0.767                           | 0.563 - 0.872           | 0.0001     |                               | 0.0001                        |
|                                                       | Elo-rating    | 53  | 0.721                           | 0.555 - 0.834           | 0.0001     |                               | 0.0001                        |
| <b>Number of Tending Males Attended (Satellited)</b>  |               |     |                                 |                         |            |                               |                               |
|                                                       | Out-degree    | 97  | -0.086                          | -0.236 - 0.089          | 0.3874     | 0.3874                        | 0.3874                        |
|                                                       | Strength      | 97  | 0.367                           | 0.161 - 0.572           | 0.0002     | 0.0004                        | 0.0003                        |
|                                                       | Closeness     | 97  | 0.431                           | 0.305 - 0.546           | 0.0001     | 0.0004                        | 0.0002                        |
|                                                       | Betweenness   | 97  | 0.197                           | -0.025 - 0.384          | 0.0511     | 0.0681                        | 0.0613                        |
|                                                       | David's score | 97  | -0.482                          | -0.605 - -0.349         | 0.0001     |                               | 0.0003                        |
|                                                       | Elo-rating    | 97  | -0.444                          | -0.562 - -0.305         | 0.0001     |                               | 0.0002                        |
| <b>Number of Tending Days</b>                         |               |     |                                 |                         |            |                               |                               |
|                                                       | Out-degree    | 108 | 0.581                           | 0.474 - 0.675           | 0.0001     | 0.0002                        | 0.0003                        |
|                                                       | Strength      | 108 | 0.569                           | 0.440 - 0.678           | 0.0001     | 0.0001                        | 0.0002                        |
|                                                       | Closeness     | 108 | 0.557                           | 0.417 - 0.673           | 0.0001     | 0.0001                        | 0.0001                        |
|                                                       | Betweenness   | 108 | 0.399                           | 0.221 - 0.551           | 0.0001     | 0.0001                        | 0.0001                        |
|                                                       | David's score | 108 | 0.391                           | 0.221 - 0.531           | 0.0001     |                               | 0.0001                        |
|                                                       | Elo-rating    | 108 | 0.460                           | 0.324 - 0.580           | 0.0001     |                               | 0.0001                        |
| <b>Avg. Number of Tending Observations per Female</b> |               |     |                                 |                         |            |                               |                               |
|                                                       | Out-degree    | 108 | 0.595                           | 0.434 - 0.738           | 0.0001     | 0.0002                        | 0.0002                        |
|                                                       | Strength      | 108 | 0.401                           | 0.191 - 0.592           | 0.0001     | 0.0002                        | 0.0002                        |
|                                                       | Closeness     | 108 | 0.345                           | 0.192 - 0.495           | 0.0002     | 0.0003                        | 0.0002                        |
|                                                       | Betweenness   | 108 | 0.209                           | 0.039 - 0.428           | 0.0295     | 0.0295                        | 0.0295                        |
|                                                       | David's score | 108 | 0.614                           | 0.475 - 0.728           | 0.0001     |                               | 0.0003                        |
|                                                       | Elo-rating    | 108 | 0.431                           | 0.472 - 0.726           | 0.0001     |                               | 0.0002                        |

**Table SD1-3.** Degrees of freedom (DF), correlation coefficient ( $r$ ), 95% confidence intervals,  $P$ -value after randomization, adjusted  $P$ -value from the 4-way Benjamini and Hochberg (B-H) false discovery rate method (using the four network centrality measures), and adjusted  $P$ -value from the 6-way B-H false discovery rate method (using the four network centrality measures and two traditional dominance measures) for number of females tended (a measure of tending effort) during the **early, mid-, and late period of breeding season** by bison males during 2004.

| Factor of Interest                            | Measure       | DF  | Correlation Coefficient ( $r$ ) | 95% Confidence Interval | $P$ -value | 4-way B-H Adjusted $P$ -value | 6-way B-H Adjusted $P$ -value |
|-----------------------------------------------|---------------|-----|---------------------------------|-------------------------|------------|-------------------------------|-------------------------------|
| <b>Early Season: Number of Females Tended</b> |               |     |                                 |                         |            |                               |                               |
|                                               | Out-degree    | 76  | 0.514                           | 0.333 – 0.679           | 0.0001     | 0.0003                        | 0.0003                        |
|                                               | Strength      | 76  | 0.406                           | 0.210 - 0.578           | 0.0006     | 0.0002                        | 0.0007                        |
|                                               | Closeness     | 76  | 0.411                           | 0.230 - 0.567           | 0.0002     | 0.0002                        | 0.0003                        |
|                                               | Betweenness   | 76  | 0.353                           | 0.093 - 0.568           | 0.0034     | 0.0003                        | 0.0034                        |
|                                               | David's score | 76  | 0.470                           | 0.250 - 0.644           | 0.0001     |                               | 0.0002                        |
|                                               | Elo-rating    | 76  | 0.452                           | 0.258 - 0.609           | 0.0001     |                               | 0.0002                        |
| <b>Mid-Season: Number of Females Tended</b>   |               |     |                                 |                         |            |                               |                               |
|                                               | Out-degree    | 108 | 0.478                           | 0.361 - 0.607           | 0.0001     | 0.0002                        | 0.0003                        |
|                                               | Strength      | 108 | 0.452                           | 0.310 - 0.586           | 0.0001     | 0.0001                        | 0.0001                        |
|                                               | Closeness     | 108 | 0.478                           | 0.327 - 0.614           | 0.0001     | 0.0001                        | 0.0002                        |
|                                               | Betweenness   | 108 | 0.372                           | 0.190 - 0.525           | 0.0001     | 0.0001                        | 0.0001                        |
|                                               | David's score | 108 | 0.283                           | 0.161 - 0.411           | 0.0027     |                               | 0.0027                        |
|                                               | Elo-rating    | 108 | 0.431                           | 0.300 - 0.556           | 0.0001     |                               | 0.0001                        |
| <b>Late Season: Number of Females Tended</b>  |               |     |                                 |                         |            |                               |                               |
|                                               | Out-degree    | 89  | 0.159                           | -0.073 - 0.379          | 0.1313     | 0.1313                        | 0.1970                        |
|                                               | Strength      | 89  | 0.262                           | 0.038 - 0.471           | 0.0107     | 0.0254                        | 0.0381                        |
|                                               | Closeness     | 89  | 0.261                           | 0.071 - 0.430           | 0.0127     | 0.0254                        | 0.0381                        |
|                                               | Betweenness   | 89  | 0.193                           | -0.033 - 0.401          | 0.0665     | 0.0887                        | 0.1330                        |
|                                               | David's score | 89  | 0.032                           | -0.229 - 0.290          | 0.7687     |                               | 0.7687                        |
|                                               | Elo-rating    | 89  | 0.048                           | -0.166 - 0.271          | 0.6525     |                               | 0.7687                        |

**Figure SD1-1. Correlation Plot.**

Correlation plot is based on Pearson’s correlation tests between network centrality measures and traditional dominance measures.

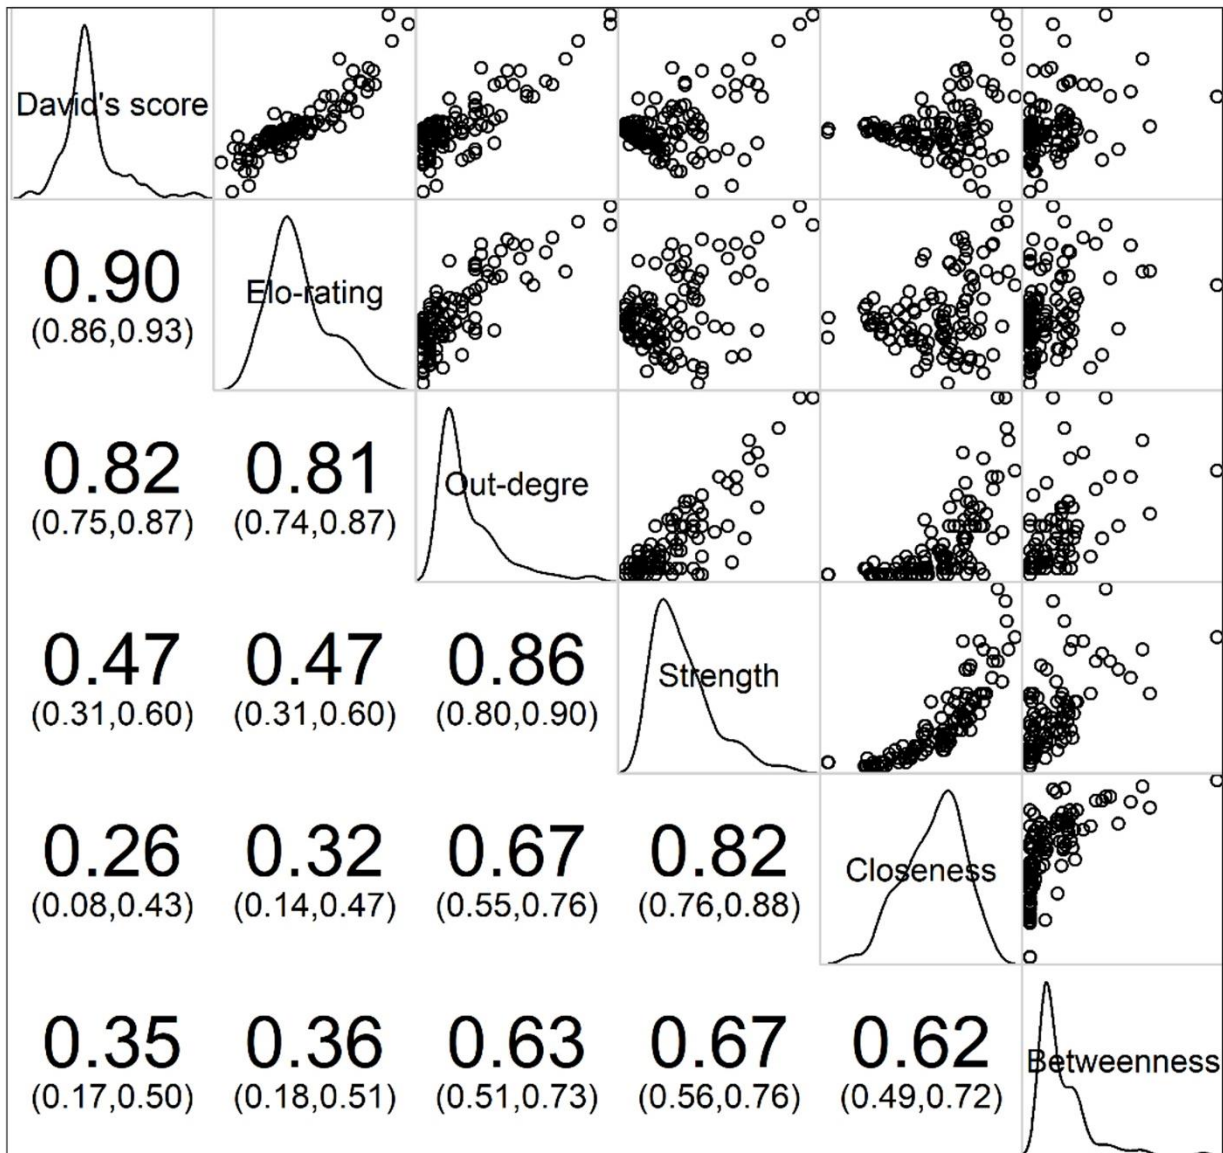

**Figure SD1-2.** Absolute Values of the Correlation Coefficients of Relationships Between All Traditional Dominance and Social Network (SN) Centrality Measures Versus Measures of Tending Tactic and Effort. The absolute values of the correlation coefficients ('abs(r)' as bars) are presented along with 95% confidence intervals (vertical black lines).

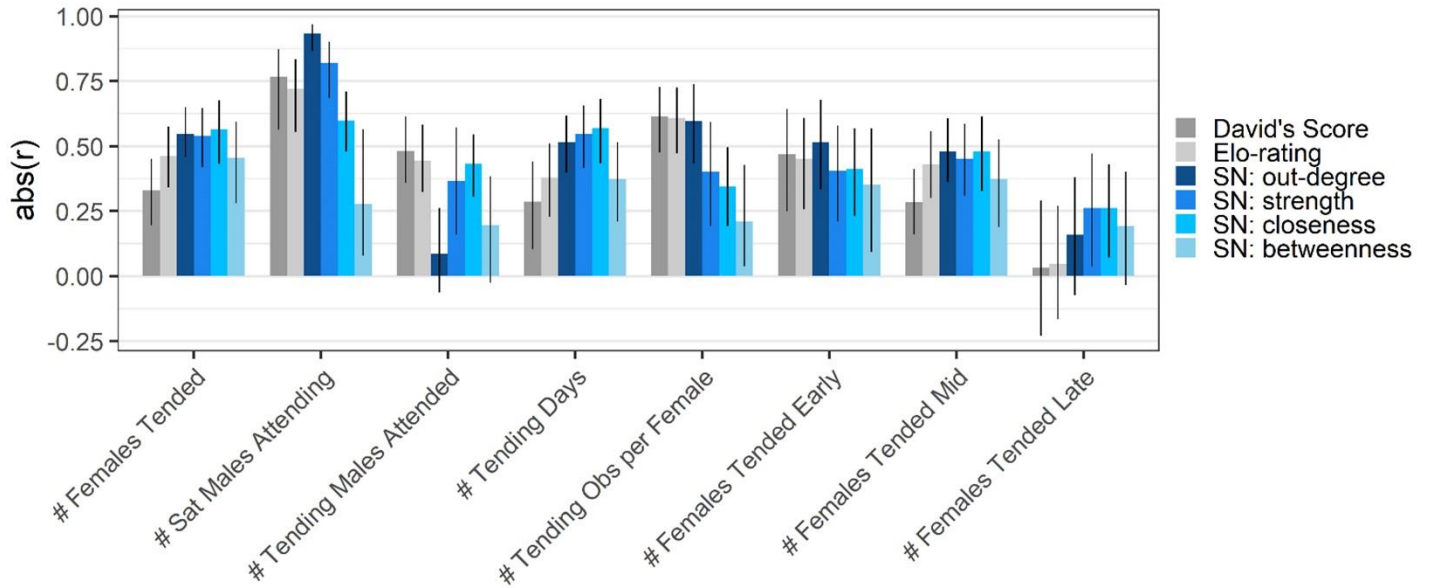

**Figure SD1-3.** Paired Plots Representing the Difference in Absolute Correlation Coefficients Between Traditional Dominance Measures and Out-degree. Paired plots depict the change in absolute correlation coefficient for all factor tests: (A) David's score vs. out-degree and (B) Elo-rating vs. out-degree. These plots illustrate the Wilcoxon signed-rank test results showing that absolute correlation coefficients from factor tests using out-degree were higher than those for tests using Elo-rating ( $V = 13, P = 0.04$ ) but not David's score ( $V = 17, P = 0.09$ ).

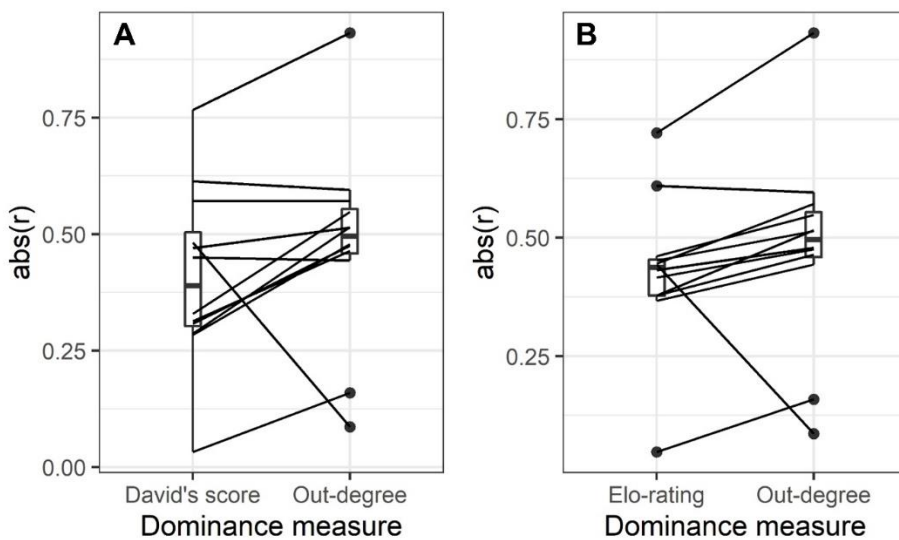

Supplement: gyaa172_suppl_supplementary_data_1.pdf [file gyaa172_suppl_supplementary_data_1.pdf]
