# Supplementary material for: Trade-offs between fighting and breeding: a social network analysis of bison male interactions
Source: Oxford University Press journal article supplement (doi:10.1093/jmammal/gyaa172), 2020-12-10

**Supplementary Data SD3:** Data Supporting Tests of Network and Dominance Measures vs. Number of Matings and Offspring

Scatterplots of Network and Dominance Measures vs. Matings and Offspring

Relationships between number of matings and offspring sired vs. the four network measures (top row) and traditional dominance measures (bottom row). Lines indicate a linear fit to the data, with significant relationships depicted with solid lines. Data points are color and shape coded according to the 33% and 66% quantiles of Elo-rating:

- Blue squares = Elo-rating < 910 (low dominance)
- Black circles = Elo-rating  $\geq 910$  and < 1026 (mid dominance)
- Red triangles = Elo-rating  $\geq 1026$  (high dominance)

**Mating Scatterplots:**

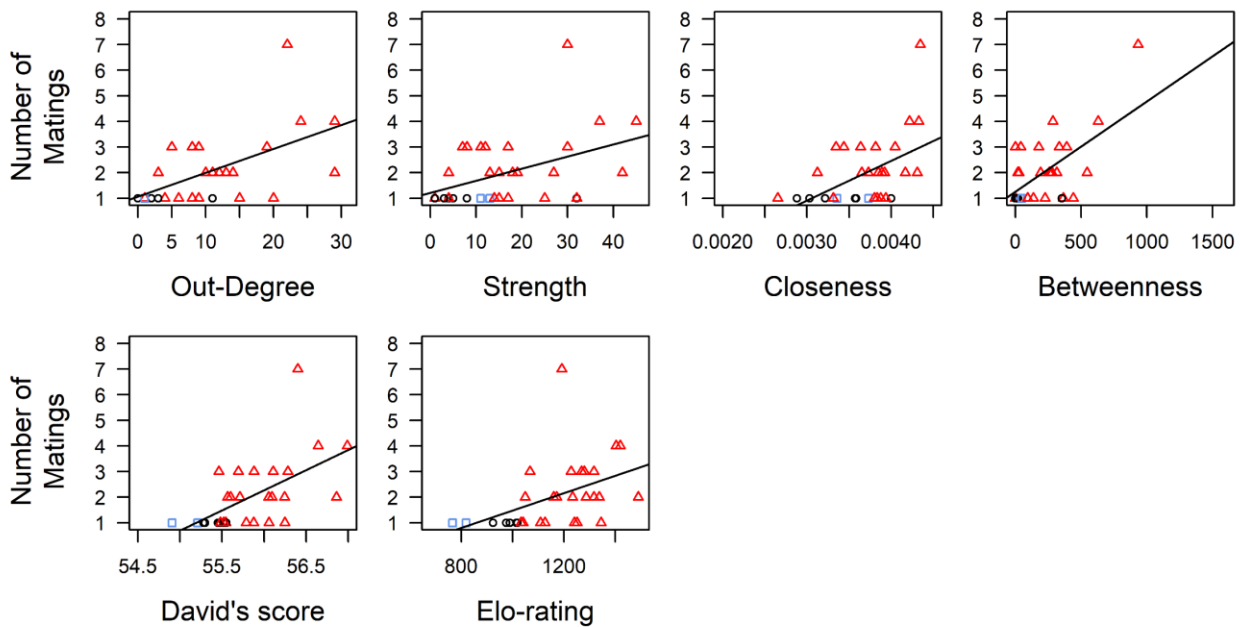

**Offspring Scatterplots:**

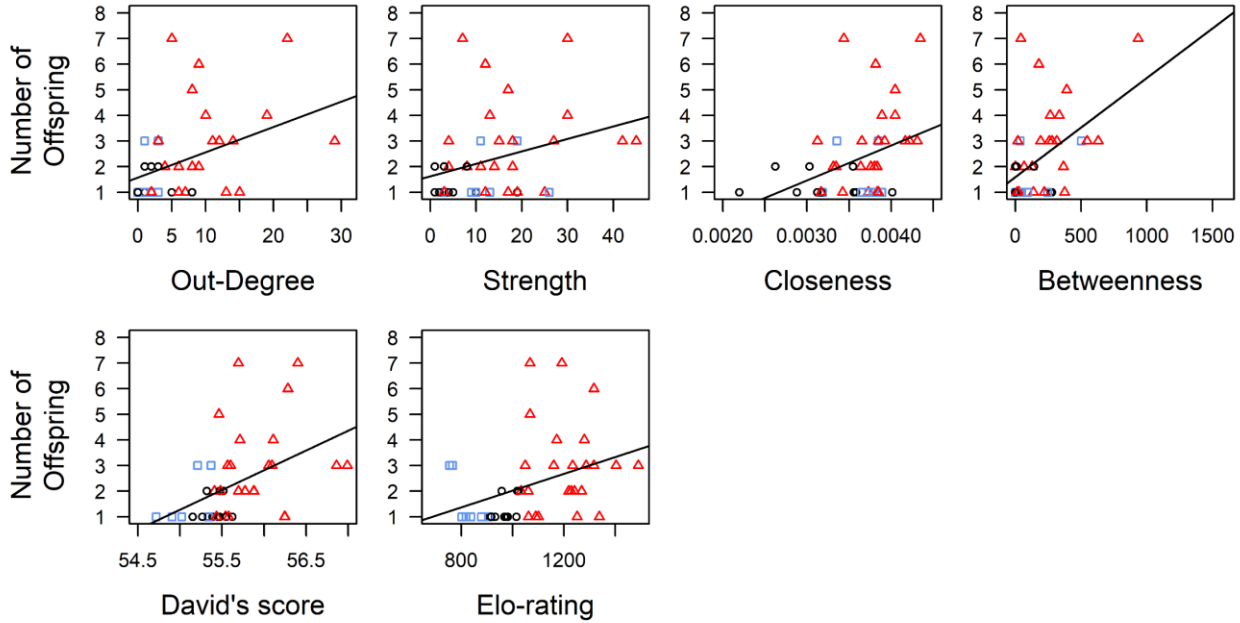

Randomization Histograms for Number of Matings and Offspring Sired vs. Network and Dominance Measures

Histograms of correlation coefficients ( $r$ ) for permutations of ID. Randomization procedure was conducted using social network measures (top row) and traditional dominance measures (bottom row). The blue line indicates the observed correlation coefficient ( $r$ ) for each test.

**Matings Histograms:**

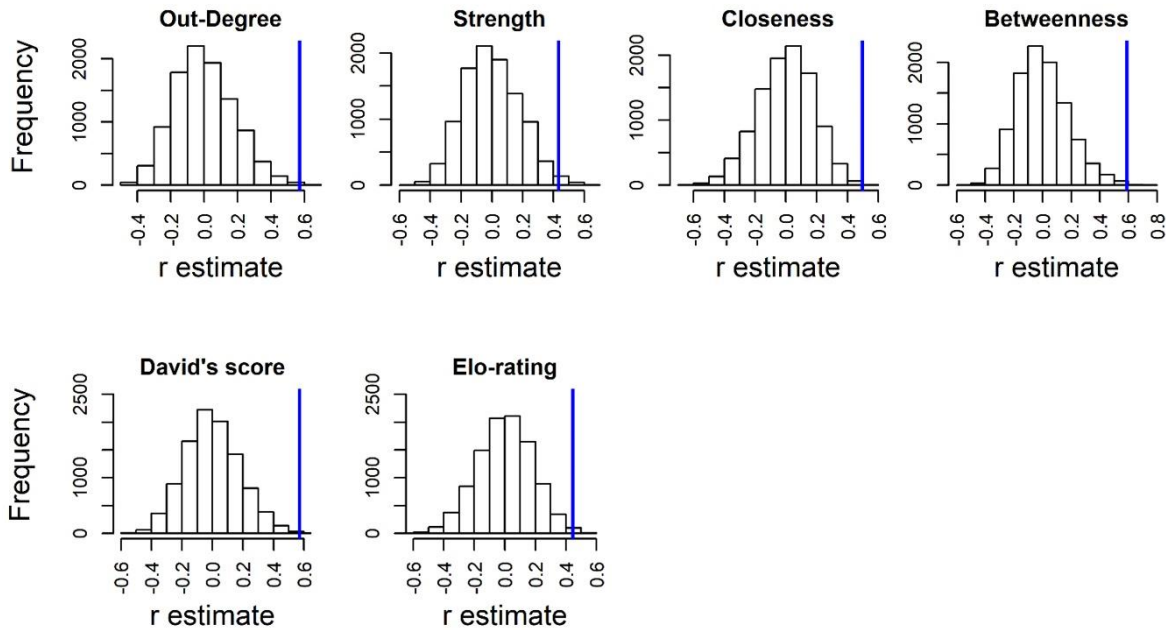

**Offspring Histograms:**

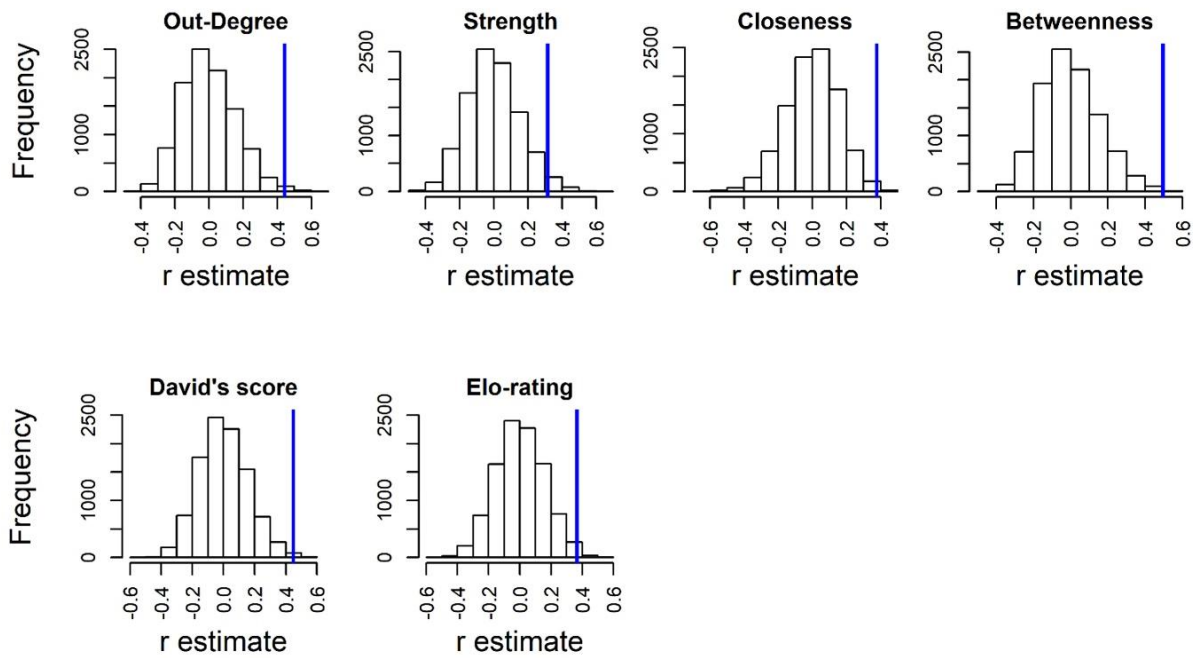

Supplement: gyaa172_suppl_supplementary_data_3.pdf [file gyaa172_suppl_supplementary_data_3.pdf]
