# Supplementary material for: Trade-offs between fighting and breeding: a social network analysis of bison male interactions
Source: Oxford University Press journal article supplement (doi:10.1093/jmammal/gyaa172), 2020-12-10

## Supplemental Data SD4: Data Supporting Tests of Network and Dominance Measures vs. Mating Tactic

### Randomization Histograms for Network and Dominance Measures vs. Mating Tactic

Histograms of correlation coefficients ( $r$ ) for permutations of ID. Randomization procedure was conducted using social network measures (top row) and traditional dominance measures (bottom row). The blue line indicates the observed correlation coefficient ( $r$ ) for each test.

#### Number of Females Tended Histograms: Participation in Tending Tactic

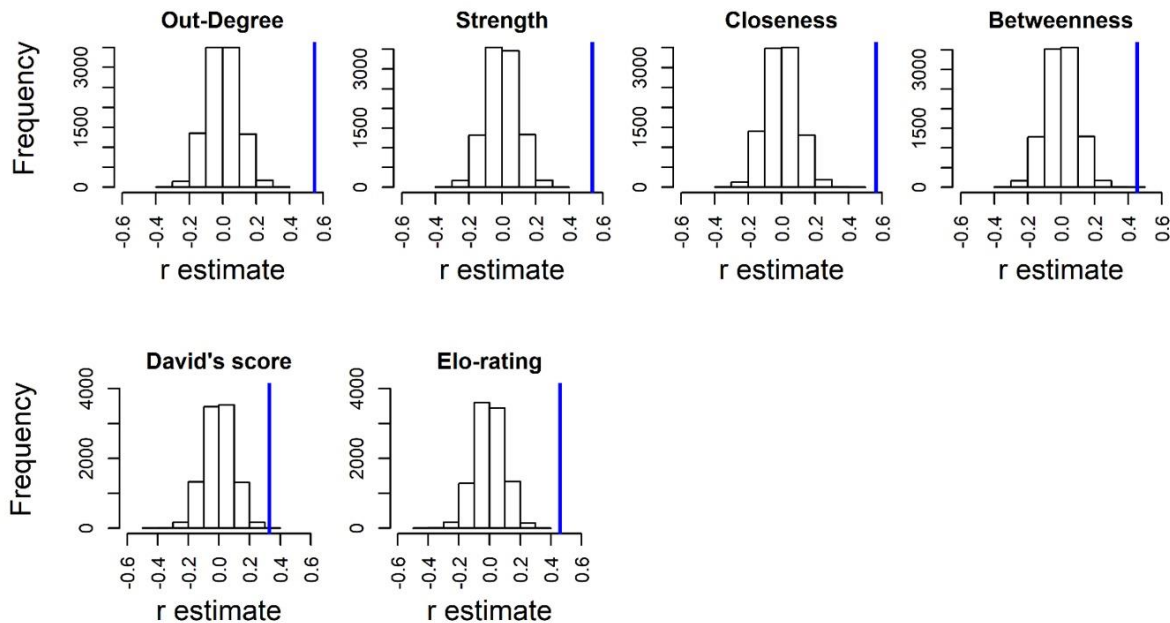

#### Number of Satellite Males Histograms: Participation in Tending Tactic

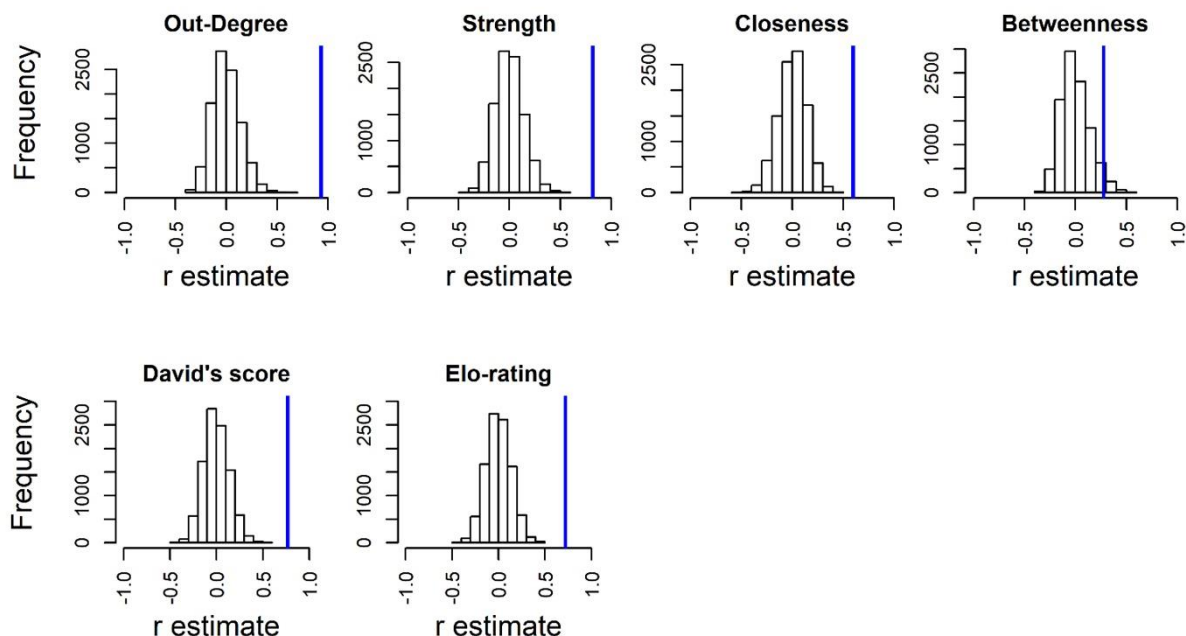

**Number of Tending Males Attended (Satellited) Histograms: Participation in Alternative Satellite Tactic**

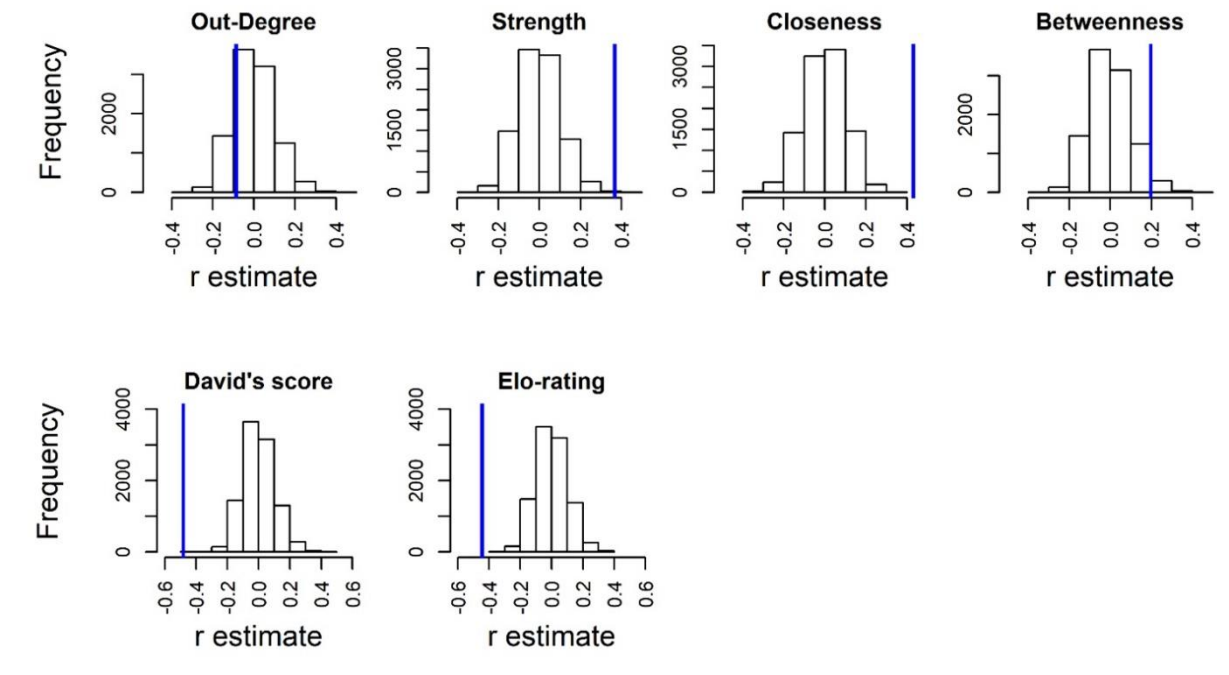

Supplement: gyaa172_suppl_supplementary_data_4.pdf [file gyaa172_suppl_supplementary_data_4.pdf]
