# Supplementary material for: Trade-offs between fighting and breeding: a social network analysis of bison male interactions
Source: Oxford University Press journal article supplement (doi:10.1093/jmammal/gyaa172), 2020-12-10

## Supplemental Data SD5: Data Supporting Tests of Network and Dominance Measures vs. Tending Effort

### Scatterplots of Network and Dominance Measures vs. Tending Effort

Relationships between tending effort vs. the four network measures (top row) and traditional dominance measures (bottom row). Lines indicate a linear fit to the data, with significant relationships depicted with solid lines. Data points are color and shape coded according to the 33% and 66% quantiles of Elo-rating:

Blue squares = Elo-rating < 910 (low dominance)

Black circles = Elo-rating  $\geq 910$  and < 1026 (mid dominance)

Red triangles = Elo-rating  $\geq 1026$  (high dominance)

### Number of Tending Days Scatterplots:

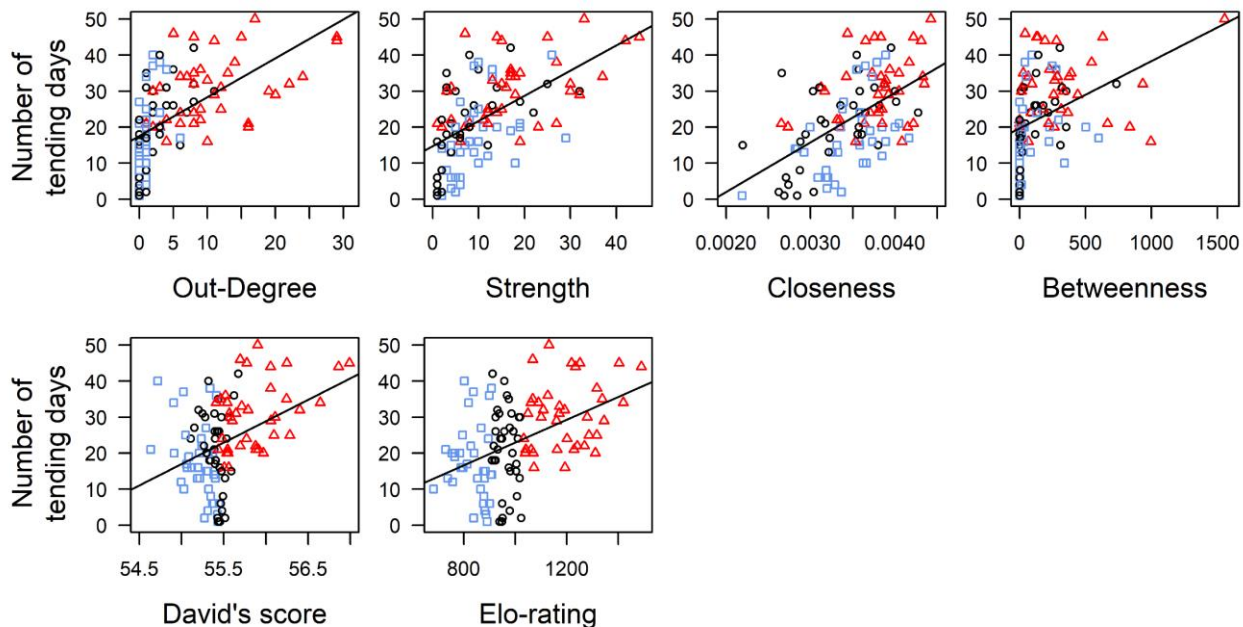

Average Number of Tending Observations per Female Scatterplots:

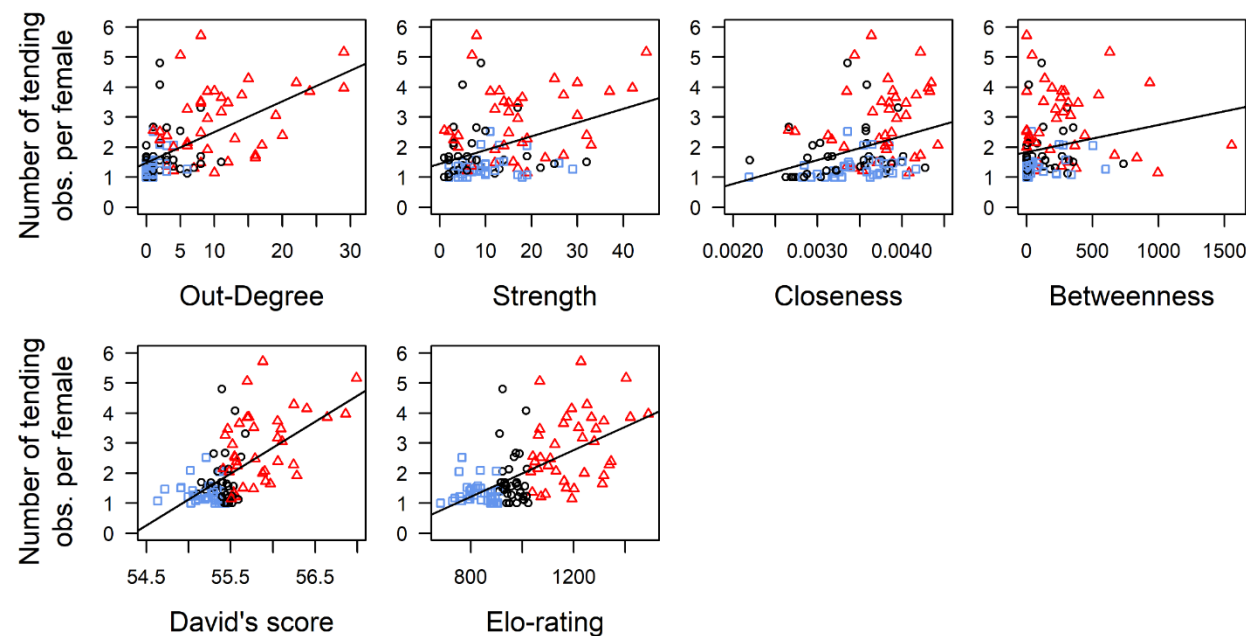

### Randomization Histograms for Network and Dominance Measures vs. Tending Effort

Histograms of correlation coefficients ( $r$ ) for permutations of ID. Randomization procedure was conducted using social network measures (top row) and traditional dominance measures (bottom row). The blue line indicates the observed correlation coefficient ( $r$ ) for each test.

#### Number of Days Tending Histograms:

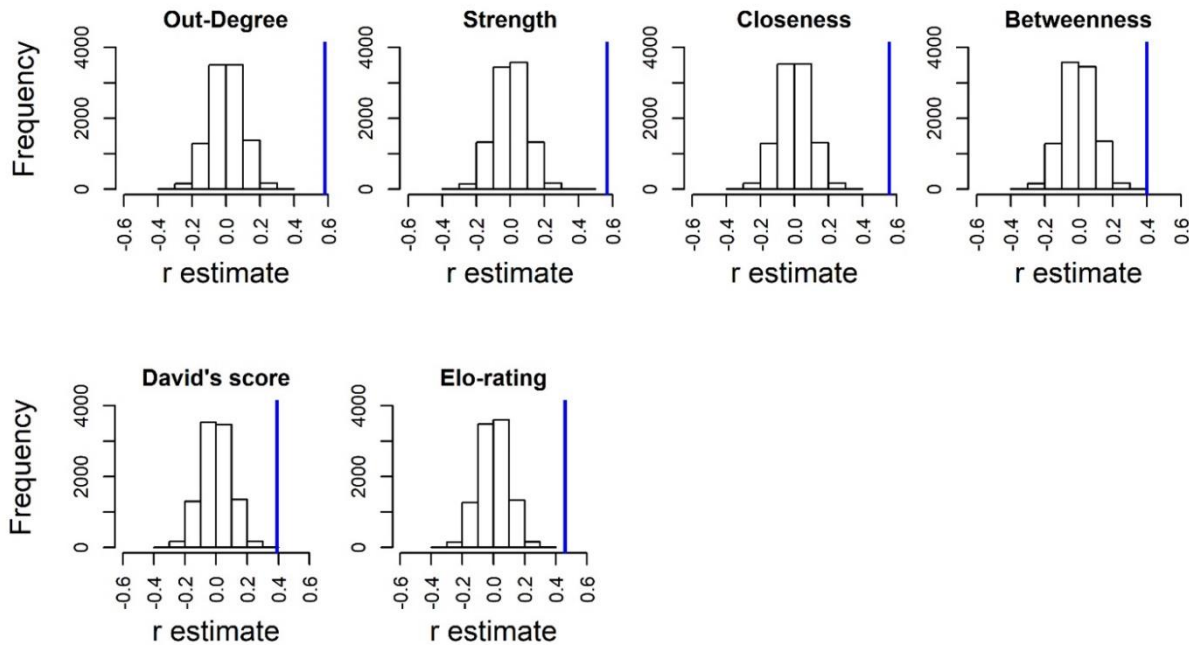

#### Average Number of Tending Observations per Female Histograms:

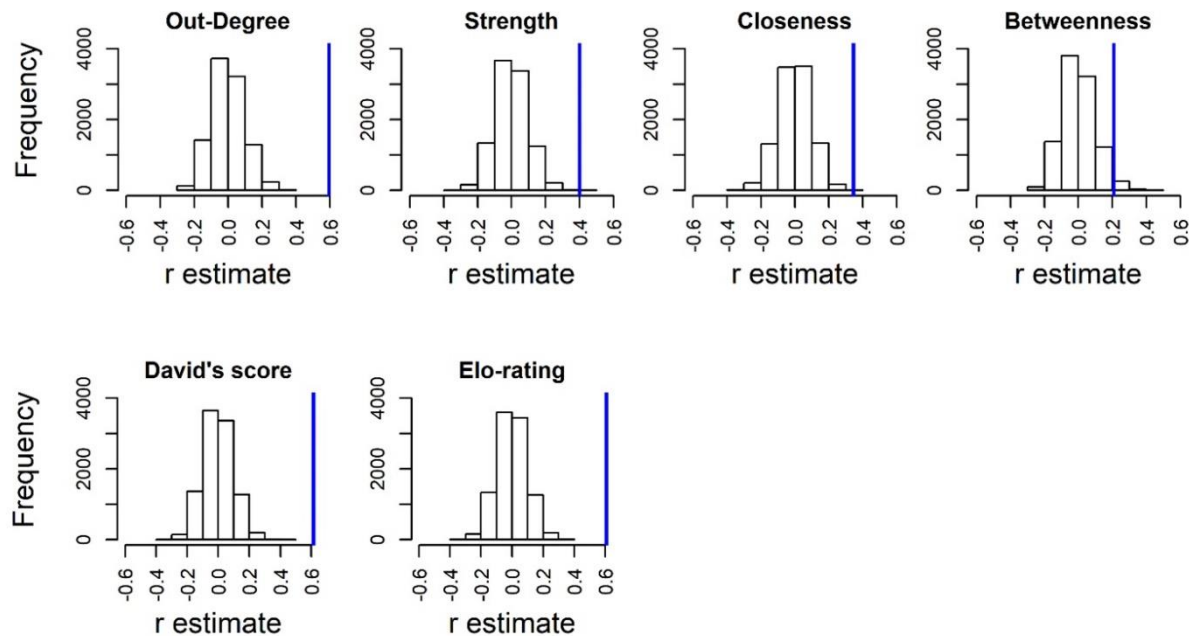

Supplement: gyaa172_suppl_supplementary_data_5.pdf [file gyaa172_suppl_supplementary_data_5.pdf]
