# Supplementary material for: Trade-offs between fighting and breeding: a social network analysis of bison male interactions
Source: Oxford University Press journal article supplement (doi:10.1093/jmammal/gyaa172), 2020-12-10

### Supplemental Data SD6: Data Supporting Tests of Network and Dominance Measures vs. Tending Tactic Seasonality

#### Scatterplots of Network and Dominance Measures vs. Tending Tactic Seasonality

Relationships between tending effort vs. the four network measures (top row) and traditional dominance measures (bottom row). Lines indicate a linear fit to the data, with significant relationships depicted with solid lines. Data points are color and shape coded according to the 33% and 66% quantiles of Elo-rating:

- Blue squares = Elo-rating < 910 (low dominance)
- Black circles = Elo-rating  $\geq 910$  and < 1026 (mid dominance)
- Red triangles = Elo-rating  $\geq 1026$  (high dominance)

#### Number of Females Tended in Early Period Scatterplots:

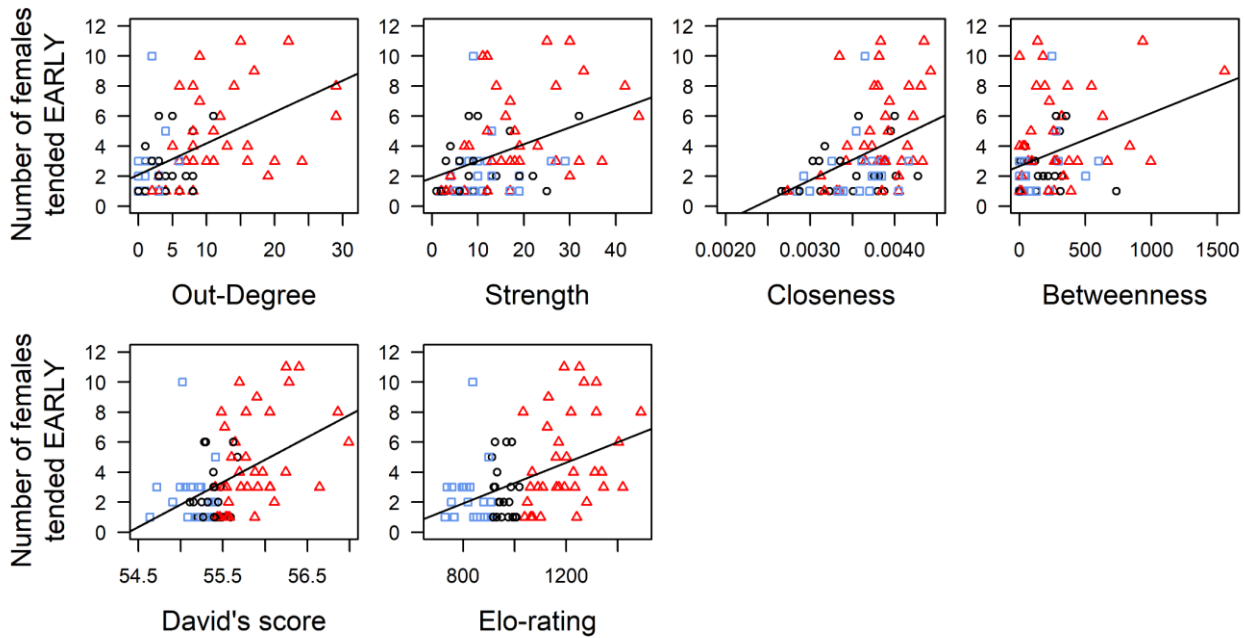

**Number of Females Tended in Middle Period Scatterplots:**

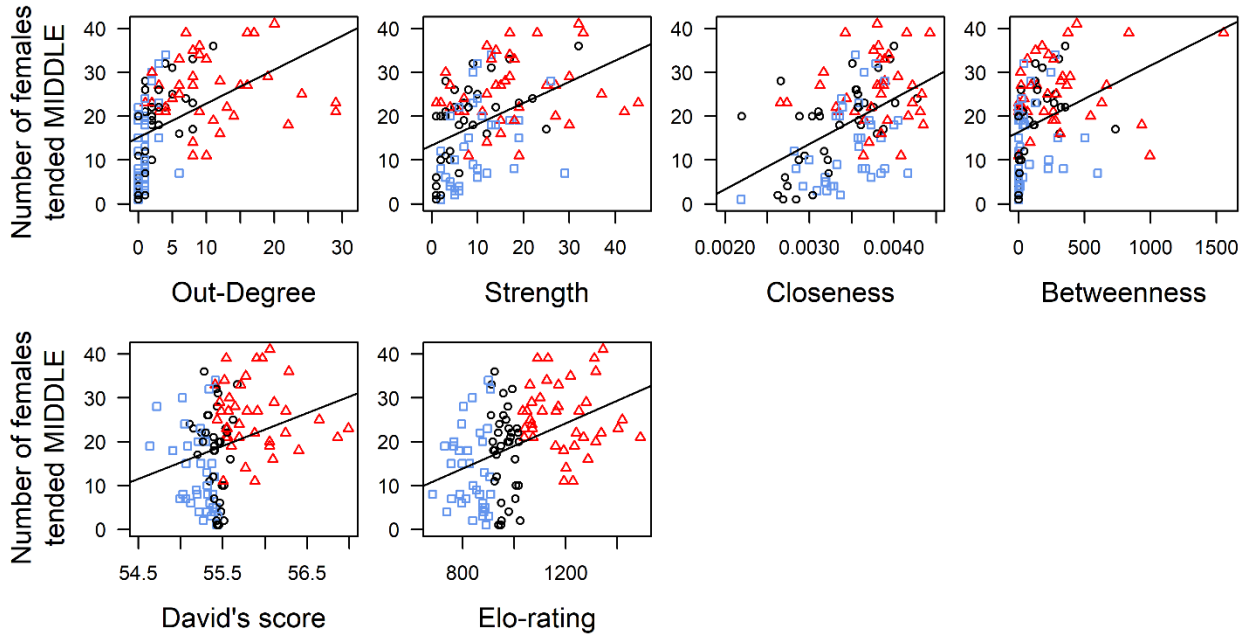

**Number of Females Tended in Late Period Scatterplots:**

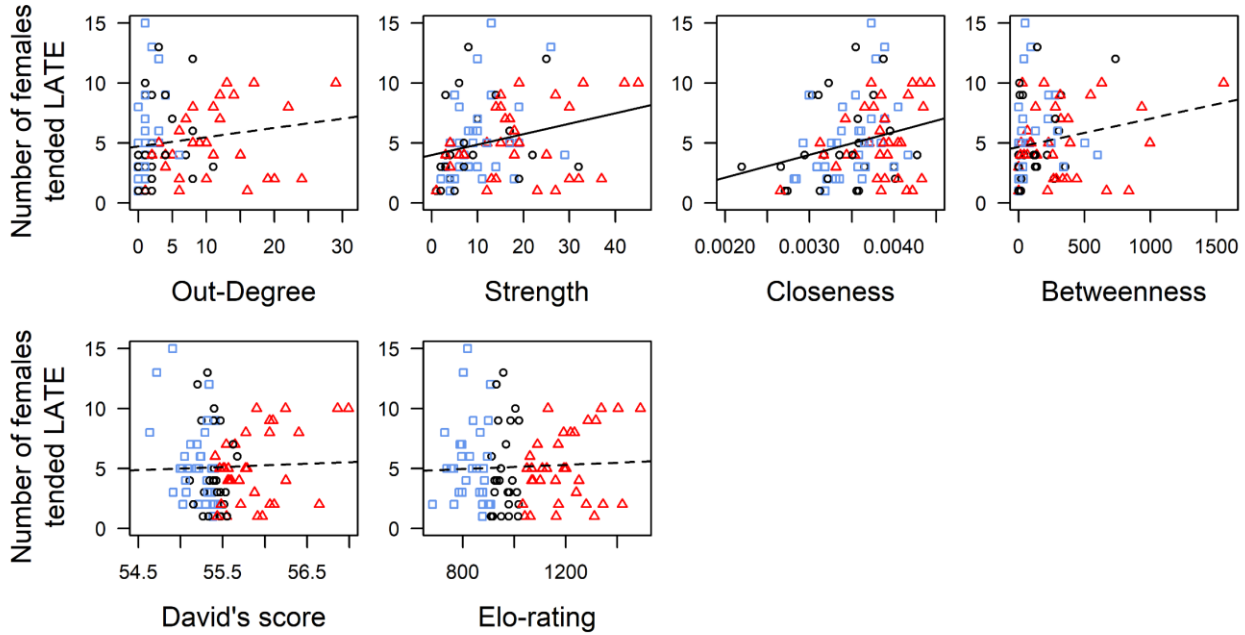

Randomization Histograms for Network and Dominance Measures vs. Tending Tactic Seasonality

Histograms of correlation coefficients ( $r$ ) for permutations of ID. Randomization procedure was conducted using social network measures (top row) and traditional dominance measures (bottom row). The blue line indicates the observed correlation coefficient ( $r$ ) for each test.

**Number of Females Tended in Early Period Histograms:**

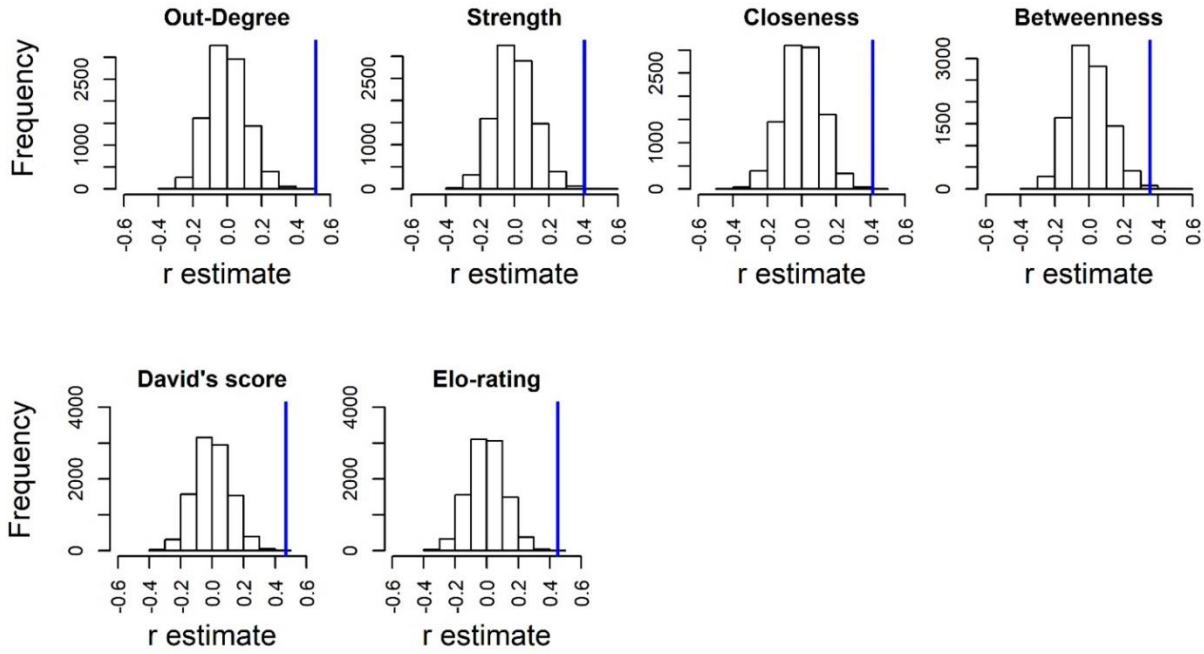

**Number of Females Tended in Middle Period Histograms:**

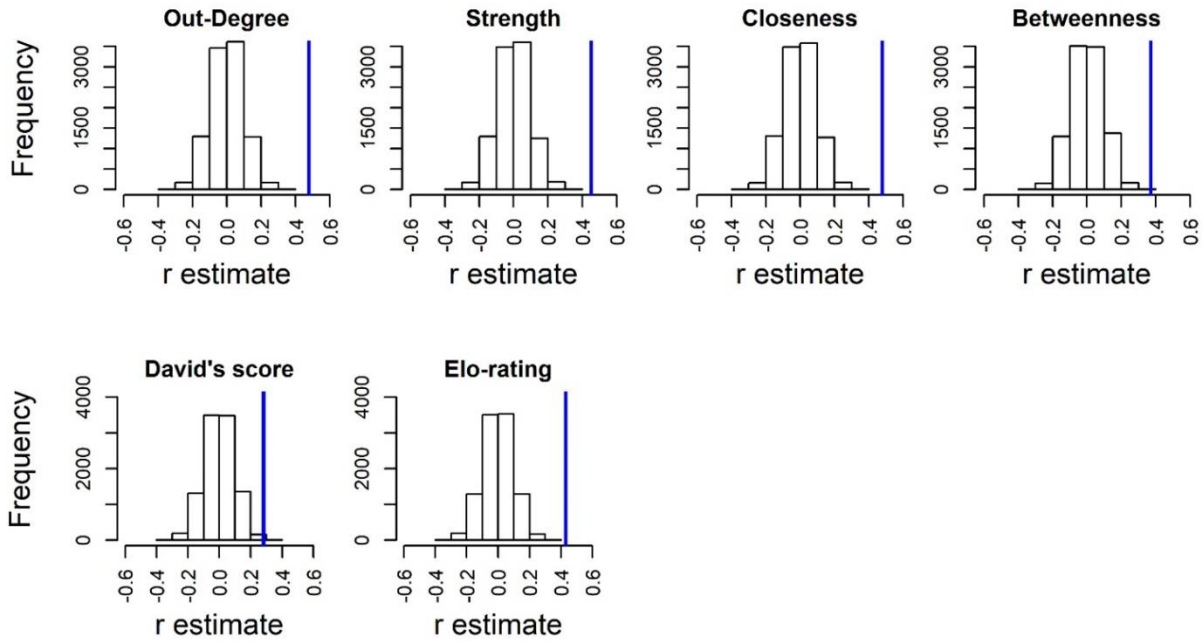

**Number of Females Tended in Late Period Histograms:**

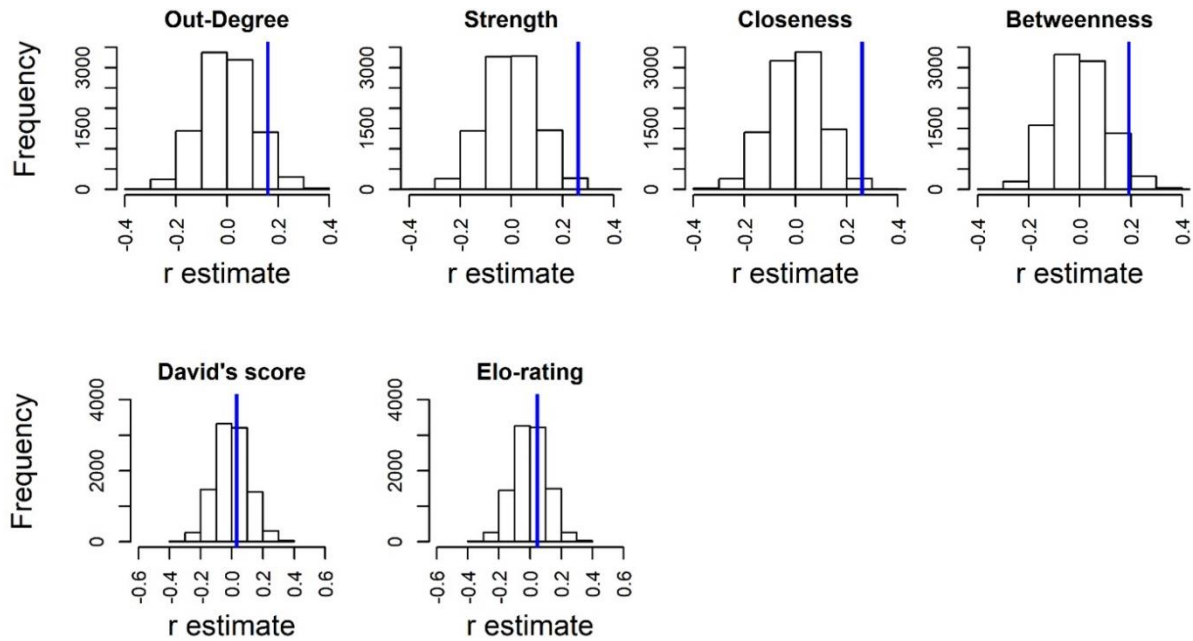

Supplement: gyaa172_suppl_supplementary_data_6.pdf [file gyaa172_suppl_supplementary_data_6.pdf]
